# Transcriptional and Translational Regulatory Responses to Iron Limitation in the Globally Distributed Marine Bacterium *Candidatus Pelagibacter ubique*

Daniel P. Smith<sup>1</sup>, Joshua B. Kitner<sup>2</sup>, Angela D. Norbeck<sup>3</sup>, Therese R. Clauss<sup>3</sup>, Mary S. Lipton<sup>3</sup>, Michael S. Schwalbach<sup>2</sup>, Laura Steindler<sup>2</sup>, Carrie D. Nicora<sup>3</sup>, Richard D. Smith<sup>3</sup>, Stephen J. Giovannoni<sup>2\*</sup>

**1** Molecular and Cellular Biology Program, Oregon State University, Corvallis, Oregon, United States of America, **2** Department of Microbiology, Oregon State University, Corvallis, Oregon, United States of America, **3** Biological and Computational Sciences Division, Pacific Northwest National Laboratory, Richland, Washington, United States of America

## Abstract

Iron is recognized as an important micronutrient that limits microbial plankton productivity over vast regions of the oceans. We investigated the gene expression responses of *Candidatus Pelagibacter ubique* cultures to iron limitation in natural seawater media supplemented with a siderophore to chelate iron. Microarray data indicated transcription of the periplasmic iron binding protein *sfuC* increased by 16-fold, and iron transporter subunits, iron-sulfur center assembly genes, and the putative ferroxidase rubrerythrin transcripts increased to a lesser extent. Quantitative peptide mass spectrometry revealed that *sfuC* protein abundance increased 27-fold, despite an average decrease of 59% across the global proteome. Thus, we propose *sfuC* as a marker gene for indicating iron limitation in marine metatranscriptomic and metaproteomic ecological surveys. The marked proteome reduction was not directly correlated to changes in the transcriptome, implicating post-transcriptional regulatory mechanisms as modulators of protein expression. Two RNA-binding proteins, CspE and CspL, correlated well with iron availability, suggesting that they may contribute to the observed differences between the transcriptome and proteome. We propose a model in which the RNA-binding activity of CspE and CspL selectively enables protein synthesis of the iron acquisition protein SfuC during transient growth-limiting episodes of iron scarcity.

**Citation:** Smith DP, Kitner JB, Norbeck AD, Clauss TR, Lipton MS, et al. (2010) Transcriptional and Translational Regulatory Responses to Iron Limitation in the Globally Distributed Marine Bacterium *Candidatus Pelagibacter ubique*. PLoS ONE 5(5): e10487. doi:10.1371/journal.pone.0010487

**Editor:** Francisco Rodriguez-Valera, Universidad Miguel Hernandez, Spain

**Received:** March 12, 2010; **Accepted:** April 11, 2010; **Published:** May 5, 2010

**Copyright:** © 2010 Smith et al. This is an open-access article distributed under the terms of the Creative Commons Attribution License, which permits unrestricted use, distribution, and reproduction in any medium, provided the original author and source are credited.

**Funding:** This work was supported by Marine Microbiology Initiative award number 607\_01 from the Gordon and Betty Moore Foundation (<http://www.moore.org/>). Portions of this research were performed at the W.R. Wiley Environmental Molecular Science Laboratory, a national scientific user facility sponsored by the U.S. Department of Energy's Office of Biological and Environmental Research, located at Pacific Northwest National Laboratory (<http://www.pnl.gov/>). PNNL is operated by Battelle Memorial Institute under DOE contract DE-AC05-76RL01830. The funders had no role in study design, data collection and analysis, decision to publish, or preparation of the manuscript.

**Competing Interests:** The authors have declared that no competing interests exist.

\* E-mail: [steve.giovannoni@oregonstate.edu](mailto:steve.giovannoni@oregonstate.edu)

## Introduction

The importance of iron as a nutrient in the oceans was first recognized by Martin [1] and later experiments verified that iron limits primary production over broad regions of the marine environment [2–4]. A variety of biological processes such as photosynthesis, N<sub>2</sub> fixation, methanogenesis, respiration, oxygen transport, gene regulation, and DNA synthesis all depend on iron-containing proteins [5]. In pelagic surface waters, planktonic communities must cope with iron concentrations that average just 70 picomolar [6]. The inhibitory effect that this has on growth was most clearly illustrated by a series of iron fertilization experiments in which iron was added to large swaths of the ocean, resulting in a marked increase in nutrient utilization [2,3,7].

Bacteria commonly have specialized systems for responding to iron limitation. Genes for iron uptake and utilization are primarily regulated by the Fur protein [8,9]. When complexed with Fe(II) cations, Fur binds the “Fur box” recognition sequence, which is made of several GATAAT hexamers [10–14]. In some bacteria, this single transcription factor can directly repress or activate more than 100 genes in response to iron scarcity [9]. Irr is a similar

transcription factor that couples intracellular heme levels to expression of many different iron-related pathways [15–21]. Small RNAs [22–25] and mRNA-binding proteins [26,27] can also regulate nonessential iron-utilizing proteins at the post-transcriptional level by selectively targeting their transcripts for degradation. To improve their chances of encountering Fe(III), many bacteria secrete siderophores [28–30]. These chelating agents help dissolve the poorly soluble particles and sequester them in a form that is unusable by competing microorganisms. Due to the spontaneous reactivity of iron ions, cells often encapsulate these atoms inside containers made of ferritin proteins to better modulate redox reactions [31,32].

*Candidatus Pelagibacter ubique* was selected as an iron limitation model for two reasons. First, this alphaproteobacterium is regularly the most numerically abundant microorganism in surveys of marine microbial diversity. Second, its proteome of just 1,354 genes is possibly the simplest of any free-living heterotrophic organism [33]. *Ca. Pelagibacter ubique*'s genome encodes Fur and Irr, but not ferritin or siderophore-related proteins, raising questions about how or if this bacterium can cope with iron stress. Investigating how this organism's relatively small

genetic repertoire produces thriving populations in the variable ocean environment has been impeded by the lack of a genetic system able to create knockouts or other genetic modifications. Thus, observing how the entire transcriptome or proteome changes in response to growth conditions has become a primary approach for elucidating metabolic and regulatory schemes [34–36]. A comparison of cultures in exponential and stationary phase did not reveal a major remodeling of the proteome nor evidence of a global regulatory mechanism [34], suggesting that this organism may continue to benefit from temporary nutrient availability regardless of overall cellular activity. That study, along with a follow-up using a metaproteomics approach on environmental samples [35], found *Ca. Pelagibacter ubique*'s proteome to be consistently composed of an unusually high proportion of transport-related proteins.

Arguably the most important characteristic of organisms is their ability to express the right proteins in the right amounts at the right times. The interplay between stimuli, sensors, and regulators precisely optimizes the combination of mRNA transcripts and protein products present in the cell. Several known and putative transcriptional regulators have been identified in the *Ca. Pelagibacter ubique* genome, as well as cis-acting riboswitches capable of modulating mRNA translation based on the concentration of particular metabolites. This method of decoupling production of mRNA from protein synthesis has been found on glycine metabolism genes in *Ca. Pelagibacter ubique* [37] and sequence motif searches [38] found additional candidate riboswitches for *s*-adenylmethionine [39,40] and thiamine pyrophosphate [40,41]. Meyer and colleagues also identified homologs to ribosomal proteins capable of regulating their own translation, as well as regions in the genome with riboswitch-like characteristics but lacking homologous annotated motifs. One of these putative structural RNA regions is located immediately upstream of the *sfuA–C* operon, which encodes an iron-acquisition system. Post-transcriptional regulation schemes allow the cell to conserve amino acids while still rapidly providing ephemeral enzymes. The success of these characteristics are evidenced by direct observation; *Ca. Pelagibacter ubique* is the most abundant heterotroph in the oceans, accounting for one-third of surface water bacteria [42,43] and consuming up to half of some dissolved organic matter compounds [44].

Combining transcriptomic and proteomic data offers a perspective on cellular activity that cannot be obtained from either method individually. Numerous studies have shown that changes in the transcriptome poorly correlate with changes to the proteome, except for very highly expressed genes [45–48]. Although much of the disparity between these two types of datasets has been attributed to measurement inaccuracy [49] and differences in protein degradation rates [50], some studies have revealed systematic post-transcriptional regulatory schemes. For instance, in the eukaryotic protozoan *Plasmodium falciparum*, mRNAs were often upregulated an entire life phase before the one in which the encoded protein was needed [51]. Additionally, translation in *Escherichia coli* was found to be partially regulated by mRNA secondary structure [52]. Therefore, it is evident that the transcriptome does not necessarily represent the current state of the proteome, but is rather a mixture of transcripts being actively translated and others that are standing by, awaiting activation by post-transcriptional regulatory mechanisms. This study integrates both transcriptomic and proteomic analyses in order to attain a more complete understanding of the cellular response to iron limitation in *Ca. Pelagibacter ubique*. The results strongly suggest that transcription and translation are not always tightly coupled in this bacterium.

## Results

### Reaction to the Siderophore

Two iron-sequestering siderophores were tested on cultures of *Ca. Pelagibacter ubique* to determine their feasibility for creating iron-limiting conditions. Ferrichrome (Sigma #F8014) and deferoxamine mesylate salt (Sigma #D9533) were both found to arrest batch culture growth within 1/3 of a doubling – an inhibition which could be reversed by addition of iron (Figure 1A). Sufficient bioavailable iron was present in the natural seawater media collected from the Oregon coast to enable cultures to grow when supplemented with 10 nM siderophore, but not when supplemented with 100 nM siderophore.

### Microarrays

Six 20 L carboys inoculated with *Ca. Pelagibacter ubique* were grown to near-maximum density, then randomly selected for treatment with either ferrichrome or ferrichrome plus excess iron (Figure 1B). To measure the amount of messenger RNA transcripts present in cells, mRNA from each carboy was hybridized to separate microarray chips containing probes for all *Ca. Pelagibacter ubique* genes. Microarray data was deposited in the NCBI GEO database under accession number GSE20962. Of the three time points where mRNA abundance was measured, the greatest difference in expression of known iron-related genes was observed 24 hours after the siderophore amendment. Table 1 lists the 23 transcripts that were expressed at least 50 percent higher in the iron-limited culture relative to the control. Two-thirds of the genes in this list come from two operons: the first containing iron-sulfur center assembly proteins including *sufA–E* and the second made up of iron uptake proteins such as *sfuA–C*. The four other genes with a known function are: rubrerythrin, an iron-binding protein that is postulated to act as a ferroxidase for converting Fe(II) to Fe(III), *hslU* and *hslV* which together form a protease complex, and dimethylglycine dehydrogenase – an enzyme that is necessary for converting betaine to glycine.

A modified radial coordinate visualization plot (Figure 2) of the microarray data shows four distinct clusters of genes: exponential growth, stationary phase, early iron stress, and late iron stress. As detailed in Supplementary Table S1, the early iron stress cluster is dominated by genes from three genomic loci: the *sfu* iron uptake operon, the *suf* iron-sulfur center assembly operon, and the functionally unclear loci SAR11\_1157, SAR11\_1158, SAR11\_1163, and SAR11\_1164. The late iron stress cluster also contains different genes that are located in or adjacent to the *sfu* and *suf* operons, but is better characterized by *lexA*, *recA*, and *mucA* – three genes involved in the SOS response. The iron response regulators *fir* and *ir* cluster with stationary phase genes, indicating that the abundances of these two transcripts are more affected by stationary phase than by iron limitation.

### Proteomics

Cellular protein fractions from each treatment were isolated and digested before being separated with liquid chromatography and injected into a tandem mass spectrometer. An Accurate Mass and Time Tag library, developed previously [34], was used to make quantitative comparisons of the abundance of individual peptides between samples. This dataset is available at <http://omics.pnl.gov/>. Of the 216 proteins detected with high certainty in this study, 18 were observed to be at least 50% more abundant in the iron-limited cultures: four on day 18, and 17 on day 28 (Table 2). The proteins SfuC, CspL, and GroES were higher in the iron-limited cultures at both timepoints. The iron-binding SfuC is unique in that it was the only one of these 18 proteins to increase

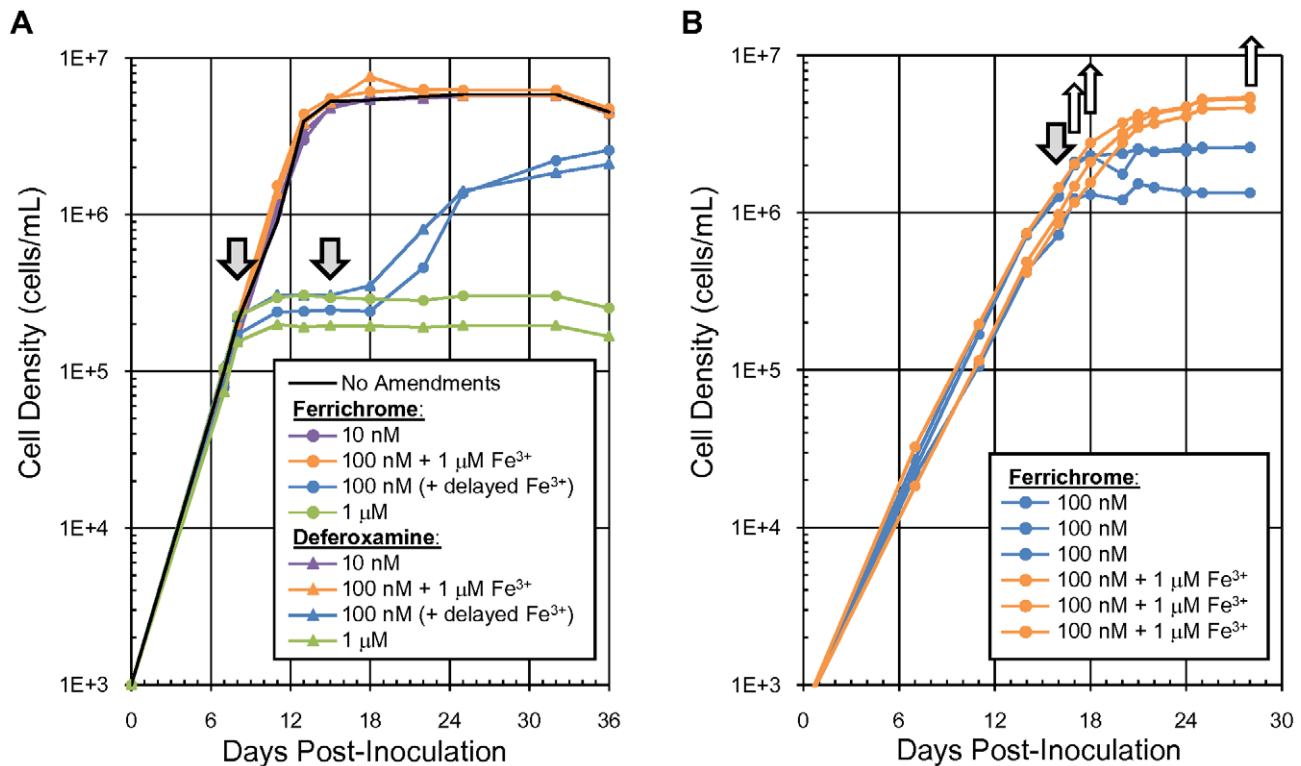

**Figure 1. Growth of *Candidatus Pelagibacter ubique* cells was arrested by iron-sequestering siderophores.** (A) Cell densities observed during a pilot experiment to test the effect of the two siderophores ferrichrome and deferoxamine mesylate salt at varying concentrations on the growth of *Candidatus Pelagibacter ubique* HTCC1062. The first arrow indicates the introduction of siderophore/iron as described by the legend. The second arrow indicates the delayed 1 μM iron additions parenthetically noted in the legend. (B) Cultures for harvesting were grown in six 20 L carboys. The first arrow indicates the introduction of siderophore/iron as described by the legend. Proteins and mRNA were analyzed on the dates indicated by the unfilled arrows: microarray samples were taken from cultures on days 17, 18, and 28; proteomic samples were taken on days 18 and 28. doi:10.1371/journal.pone.0010487.g001

in both protein and mRNA abundance by at least 50%. CspL was originally annotated as a DNA-binding protein, however, similar proteins have been found to modulate the accessibility of mRNA binding sites by selectively melting secondary RNA structures [53]. The third protein, GroES, forms a complex with GroEL to mediate protein folding. Because the required GroEL subunit was much less abundant in iron-limited cultures, and since the three largest GroES peptide spectra (out of 9) were less pronounced in the iron-limited cultures, GroES may be a false positive. Mass spectrometry measurements did not reveal a significant change in Fur or Irr abundance between treatments or timepoints.

Iron-limitation had a marked impact on the overall proteome. Two days after addition of an iron-chelator, 181 of the 216 proteins were significantly ( $P \leq 0.05$ ) less abundant in the iron-limited cultures relative to the control cultures. Using the same criteria, only 32 of the 216 proteins were found to significantly decrease in the control cultures between days 18 and 28 as *Ca. Pelagibacter ubique* cells entered stationary phase due to an unknown, non-iron, limitation.

### Comparing Changes in mRNA and Protein Abundances

Aside from the highly expressed iron-binding protein SfuC, the abundances of individual proteins appeared to be independent of the amount of mRNA encoding them (Figure 3).

### Discussion

We are studying keystone microbial plankton species such as *Ca. Pelagibacter ubique* in culture to provide a basis for interpreting

data emerging from molecular ecology studies. In an era of rapid environmental change, metagenomics, and allied technologies such as metaproteomics and metatranscriptomics, are being used to monitor the structure and health of natural ecosystems and to identify ecological processes that impact biogeochemistry. Interpretations of these data depend on understanding how complex cellular systems respond to environmental factors. We focused on a microorganism, *Ca. Pelagibacter ubique*, that produces the largest signal in most environmental studies of marine macromolecules, and a process, iron limitation, that impacts marine ecology on very large geographical scales.

### Upregulation of *sfuC* during iron limitation

The only gene to clearly increase in both mRNA and protein abundance during iron limitation was *sfuC*. This protein localizes to the periplasmic space and binds dissolved Fe(III) with high affinity. The SfuC-Fe complex associates with the ATPase (SfuA) and permease (SfuB) components of the tripartite ABC transporter complex to actively transport iron into the cell. The fact that *sfuA* and *sfuB* were not observed to increase in protein abundance is not wholly unexpected – SfuA-SfuB complexes only interact with iron-bound SfuC proteins, which are a very small fraction of the total SfuC pool in an iron-limited environment. Additionally, integral membrane proteins such as SfuB are particularly challenging to recover in proteomic studies because they are not readily soluble. This likely contributed to the complete absence of SfuB peptides in all mass spectrometry studies of *Ca. Pelagibacter ubique* to date.

The identification of *sfuC* expression as a readily quantifiable iron limitation marker is particularly useful for ecological surveys.

**Table 1.** All 23 *Ca. Pelagibacter ubique* mRNA transcripts that were at least 50 percent more abundant in the iron-limited cultures compared to the control cultures, 24 hours after addition of an iron-chelator.

| Locus ID     | Gene         | Description                                                           | Ratio <sup>a</sup> | P Value <sup>b</sup> | Cluster |
|--------------|--------------|-----------------------------------------------------------------------|--------------------|----------------------|---------|
| SAR11_0144   |              | Conserved hypothetical protein                                        | 1.54               | 0.001                | Early   |
| SAR11_0333 • | <i>hslV</i>  | ATP-dependent protease: peptidase                                     | 1.63               | 0.000                | Stat.   |
| SAR11_0334 • | <i>hslU</i>  | ATP-dependent protease: ATP-binding                                   | 1.59               | 0.035                |         |
| SAR11_0399   | <i>rbr</i>   | Rubryerythrin, hyp. ferroxidase (Fe <sup>2+</sup> →Fe <sup>3+</sup> ) | 1.57               | 0.025                |         |
| SAR11_0738 • | <i>sufA</i>  | Transcriptional regulator                                             | 1.76               | 0.062                | Stat.   |
| SAR11_0739 • | <i>sufB</i>  | Cysteine desulfurase activator complex                                | 2.00               | 0.009                | Early   |
| SAR11_0740 • | <i>sufC</i>  | FeS assembly ATPase                                                   | 1.80               | 0.017                | Early   |
| SAR11_0741 • | <i>sufD</i>  | FeS assembly protein                                                  | 2.29               | 0.019                | Early   |
| SAR11_0742 • | <i>csdB</i>  | Selenocysteine lyase chain A                                          | 2.44               | 0.046                | Early   |
| SAR11_0743 • | <i>sufE</i>  | Putative NifU-like protein                                            | 2.24               | 0.004                | Late    |
| SAR11_0744 • | <i>paaD</i>  | Phenylacetic acid degradation protein                                 | 2.00               | 0.001                | Early   |
| SAR11_0745 • | <i>hesB</i>  | HesB protein                                                          | 1.95               | 0.000                | Early   |
| SAR11_0785   |              | Conserved hypothetical protein (DUF952)                               | 1.52               | 0.051                | Late    |
| SAR11_1233 • |              | Domain of unknown function (DUF931)                                   | 3.36               | 0.001                | Early   |
| SAR11_1235 • | <i>azlC</i>  | AzlC protein                                                          | 2.14               | 0.016                | Early   |
| SAR11_1236 • | <i>sfuA</i>  | Iron(III) ABC transporter: ATP-binding                                | 4.99               | 0.000                | Early   |
| SAR11_1237 • | <i>sfuB</i>  | Iron(III) ABC transporter: permease                                   | 10.36              | 0.000                | Early   |
| SAR11_1238 • | <i>sfuC</i>  | Iron(III) ABC transporter: periplasmic                                | 16.00              | 0.003                | Early   |
| SAR11_1239 • |              | Unknown protein                                                       | 2.47               | 0.006                | Late    |
| SAR11_1240 • | <i>aceA</i>  | Isocitrate lyase                                                      | 1.58               | 0.091                | Late    |
| SAR11_1242 • |              | Transcription regulator                                               | 1.60               | 0.054                | Late    |
| SAR11_1253   | <i>dmgdh</i> | Dimethylglycine dehydrogenase                                         | 1.54               | 0.054                | Late    |
| SAR11_1279   |              | Unknown membrane protein                                              | 1.56               | 0.056                |         |

**Seventy-eight percent of these genes are found in Figure 2's early and late iron stress clusters. Bullet points in the first column indicate contiguous loci.**

<sup>a</sup>Average fluorescence of three replicates, (iron limited culture/iron replete culture).

<sup>b</sup>Result of a two-tailed Student's t-test comparing the three biological replicates for each treatment.

doi:10.1371/journal.pone.0010487.t001

As its name suggests, *Ca. Pelagibacter ubique*'s genome, transcriptome, and proteome regularly dominate bacterial surveys throughout the pelagic environment. Future oceanographic studies seeking evidence of iron availability limiting bacterioplankton growth may use metatranscriptomic or metaproteomic analyses to assess the expression of *sfuC* in the local *Ca. Pelagibacter ubique* population.

### Transcriptome distinct from proteome

Protein abundance was generally uncorrelated with changes in mRNA abundance, suggesting that post-transcriptional mechanisms might be acting at the RNA level to suppress translation. As reviewed in the introduction, previous studies have shown that disparities between a cell's transcriptome and proteome are the norm rather than the exception. However, the observation that iron-related genes such as *sufA–E* increased in mRNA but not protein indicates that expression of these proteins are controlled at both the level of transcription and at the level of translation.

### Cold-shock proteins correlated with iron stress

CspL was significantly more abundant in iron-limited cultures (Figure 4), leading us to closely examine the biological activity of this protein as well as the inversely expressed homolog CspE. The first discovered member of the cold-shock protein (CSP) family, *E. coli*'s CspA, is highly upregulated under cold stress; it is believed to associate with and melt double-stranded RNA complexes as a

mechanism to prevent spurious stem loop structures from interfering with transcription and translation [54–59]. Despite their homology to CspA, many CSP variants are not cold-inducible, but rather are involved in regulating cellular processes [54,60–62] and can even target their activity to specific RNA sequences [63]. A growing body of literature has described mRNAs which modulate their own expression via temperature- (RNA thermometer) or ligand-sensitive (riboswitch) secondary structures [64,65]. Due to the episodic nature of iron deposition into ocean surface waters [66] and the resulting selective pressure favoring rapid response systems for this limiting nutrient [67], we speculate that *Ca. Pelagibacter ubique* CspE and/or CspL affects a reversible inhibition of translation by facilitating an mRNA secondary structure unfavorable for ribosome processing, thereby maintaining the transcriptome in a state of cell growth readiness during times of stress such as iron limitation.

This is the first report describing the general suppression of translation across the entire transcriptome of the cell. In this case, the apparent adaptive significance of protein synthesis suppression is related to urgent cellular requirements to acquire an essential nutrient. The model we propose to explain this phenomenon incorporates activity previously observed in cold-shock proteins, however, the essence of our model assigns cold-shock proteins a new systemic role in *Ca. Pelagibacter ubique* cells with the apparent result of focusing protein synthesis on transporters that target a missing essential nutrient. The validation of this model is

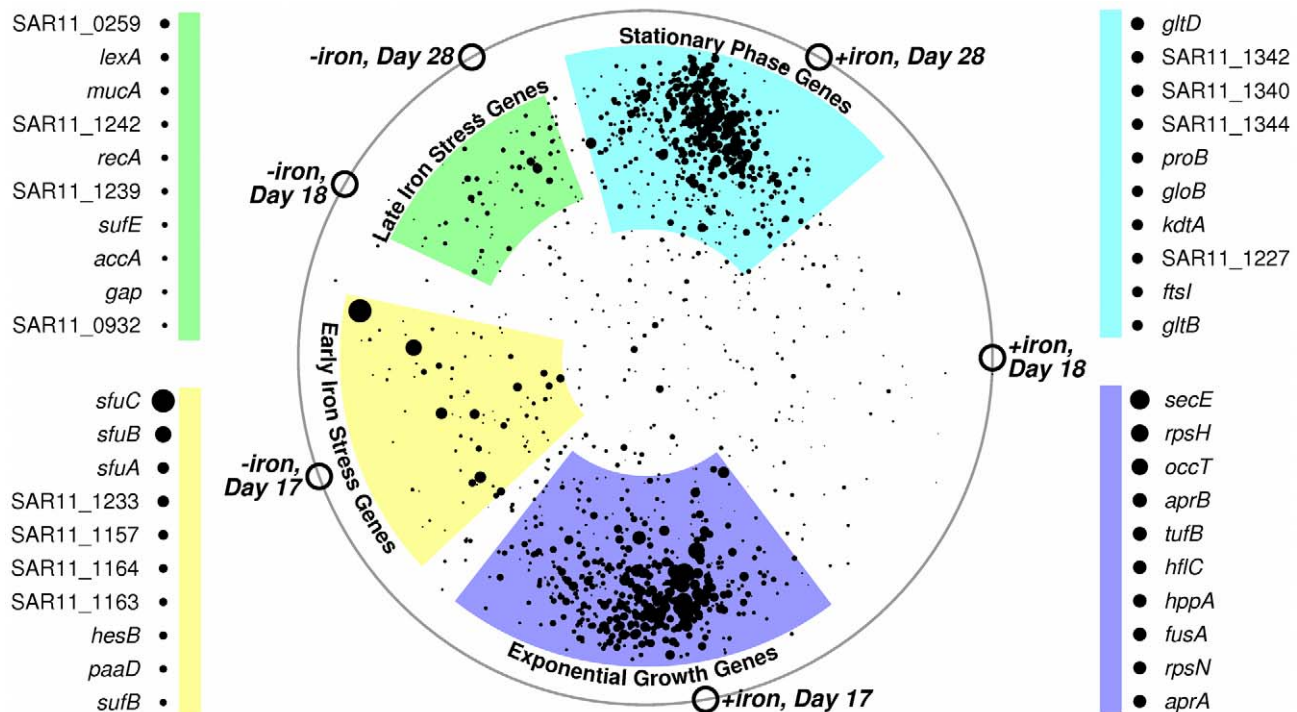

**Figure 2. Genes transcribed during iron limitation were different from stationary phase genes.** The four clusters indicate up-regulation of similar condition-specific mRNA. Symbols for each microarray sample (open circles) were manually positioned on a circle according to each sample's iron availability and growth rate. Genes were "attracted" to the samples in which they were most abundant. Larger points indicate genes with larger condition-to-condition variation; a key for the 10 largest points in each cluster is provided. The complete list of gene locations for this graph can be found in Supplementary Table S1. doi:10.1371/journal.pone.0010487.g002

beyond the scope of this study. Future work may more precisely identify interactions between cold-shock proteins and specific RNA motifs.

## Summary

Census information has left little doubt that *Ca. Pelagibacter ubique* plays its role in biological oceanography on a vast scale. To understand this role, we turned inward, investigating the mechanisms used by these cells to respond to a common form of nutritional stress. One motivation for this study can be described with a term borrowed from satellite remote sensing: the term "ground truth" was coined to describe the validation, by direct measurements, of remotely sensed observations. Metatranscriptomic and metaproteomic measurements are being widely adopted by microbial ecologists anticipating that these approaches will reveal the metabolic status of cells in microbial communities, providing information that can be extrapolated to interpret broader levels of ecosystem function. Essential to this vision is an understanding of how cells respond to environmental variables. Our findings indicate that the periplasmic iron binding protein *sfuC* is uniquely suitable for assessing the iron limitation status of *Ca. Pelagibacter ubique* cells. We anticipate that ecologists will use this data for interpreting the nutritional status of *Ca. Pelagibacter ubique* cells in nature.

This study, one of the few to simultaneously examine both transcriptional and translational responses in a bacteria cell, uncovered evidence suggesting that *csbL* might play a role in the cellular response to iron limitation. We offer the model that this protein controls translation in response to environmental conditions for a specific subset of genes present in the transcriptome. We hypothesize that this activity might serve an emergency function,

limiting the synthesis of proteins to those that are critical for survival. This finding is consistent with previous reports of post-transcriptional regulation of the iron stress response in which a protein was found to facilitate the degradation of specific mRNAs which encoded nonessential iron-consuming pathways [26,27].

Not only is *Ca. Pelagibacter ubique* one of the most successful cells known, it is also one of the simplest, giving it value as a model for understanding bacterial cell responses. Indeed, numerous new structural RNAs, some widely distributed among bacteria, have been discovered and described in *Ca. Pelagibacter ubique* [37,38]. It is perhaps hubris to imagine that the concept of systems biology might one day be extended from the machinery of cells to the machinery of microbial ecosystems at work on the scale of oceans. But, if that vision has a chance, it will be by combining studies that cross scales and disciplines to understand the keystone species of the oceans.

## Materials and Methods

### Growth Media and Harvesting

Seawater was collected on 6/14/08 at the Newport Hydroline station NH5 (44°39.1'N, 124°10.6'W) from a depth of 10 m. The water was then filtered through a 0.2 μm filter, autoclaved, and sparged with CO<sub>2</sub> for 24 hours followed by air for 24–48 hours as previously described [68,69]. Immediately prior to inoculation with *Ca. Pelagibacter ubique* HTCC1062, the media was amended with 50 μM pyruvate, 50 μM glucose, 10 μM nitrogen, 1 μM methionine, 1 μM glycine, 1 μM phosphate, and vitamins. Cells were grown at 20°C (flasks) or 16°C (carboys) with intermittent light and sparging with air. On day 16, three 20 L control cultures were amended with 100 nM ferrichrome and



**Table 2.** All 17 *Ca. Pelagibacter ubique* proteins that were at least 50 percent more abundant in the iron-limited cultures compared to the iron replete cultures, two and 12 days after addition of an iron chelator.

| Day | Locus ID   | Gene         | Description                             | Ratio <sup>a</sup> | P Value <sup>b</sup> |
|-----|------------|--------------|-----------------------------------------|--------------------|----------------------|
| 18  | SAR11_1238 | <i>sfuC</i>  | Iron(III) ABC transporter: periplasmic  | 11.41              | 0.000                |
| 18  | SAR11_1274 | <i>cspL</i>  | DNA-binding cold shock protein          | 6.20               | 0.000                |
| 18  | SAR11_0161 | <i>groES</i> | Protein-folding chaperonin              | 2.01               | 0.028                |
| 18  | SAR11_1062 | <i>dapA</i>  | Dihydrodipicolinate synthase            | 1.53               | 0.849                |
| 28  | SAR11_1238 | <i>sfuC</i>  | Iron(III) ABC transporter: periplasmic  | 26.96              | 0.000                |
| 28  | SAR11_1161 | <i>sbpC</i>  | ATPase involved in DNA repair           | 4.59               | 0.011                |
| 28  | SAR11_0161 | <i>groES</i> | Protein-folding chaperonin              | 3.59               | 0.008                |
| 28  | SAR11_0601 | <i>ftsH</i>  | Metalloprotease                         | 3.28               | 0.001                |
| 28  | SAR11_1124 | <i>rplL</i>  | 50S ribosomal protein L31               | 3.16               | 0.006                |
| 28  | SAR11_0430 | <i>aceF</i>  | Dihydrodipicolinate S-acetyltransferase | 3.02               | 0.094                |
| 28  | SAR11_0171 |              | Rhodanese-related sulfurtransferase     | 2.74               | 0.002                |
| 28  | SAR11_0791 |              | Ring-cleaving dioxygenase               | 2.42               | 0.336                |
| 28  | SAR11_1274 | <i>cspL</i>  | DNA-binding cold shock protein          | 2.27               | 0.437                |
| 28  | SAR11_0235 | <i>pdhD</i>  | Dihydrodipicolinate dehydrogenase       | 2.26               | 0.035                |
| 28  | SAR11_0401 |              | Conserved hypothetical protein          | 2.21               | 0.003                |
| 28  | SAR11_0054 | <i>pilA</i>  | Pilin protein                           | 2.16               | 0.020                |
| 28  | SAR11_0727 | <i>accB</i>  | Acetyl-CoA carboxylase                  | 2.03               | 0.301                |
| 28  | SAR11_0987 | <i>ppiB</i>  | Peptidylprolyl isomerase                | 1.99               | 0.291                |
| 28  | SAR11_0793 |              | Unknown protein                         | 1.74               | 0.128                |
| 28  | SAR11_0599 |              | Hypothetical protein                    | 1.70               | 0.623                |
| 28  | SAR11_0708 | <i>acpP</i>  | Acyl carrier protein                    | 1.55               | 0.198                |

Genes in bold were more abundant in the iron-limited cultures at both timepoints.

<sup>a</sup>Average spectra height of at least three peptides, (iron limited culture/iron replete culture).

<sup>b</sup>Combined one-tailed Student's t-test comparing the three technical replicates for each treatment.

doi:10.1371/journal.pone.0010487.t002

1  $\mu\text{M}$   $\text{FeCl}_3$ , and three 20 L treatment cultures were amended with 100 nM ferrichrome only. On day 18, 8 L from each carboy was harvested. On day 28, the remaining  $\sim 10\text{L}$  from each was harvested. Prior to each harvest, and on day 17, three 40 mL samples of culture were removed from each culture for microarrays. Water from the three replicate cultures were then combined and growth was arrested using 0.01g chloramphenicol and 0.1 mL protease inhibitor cocktail II (CalBiochem #539132) per liter of culture. Tangential flow filtration, followed by centrifugation produced cell pellets for the mass-spectrometry analysis. All samples were kept at  $-80^\circ\text{C}$  until analysis.

### Messenger RNA Preparation

*Ca. Pelagibacter ubique* cells used in microarray experiments were grown in batch cultures as described above. Cells (40 ml for each biological replicate) were collected via centrifugation, and RNA was extracted using RNeasy Mini kits (Qiagen), followed by amplification with MessageAmp-II Bacteria RNA amplification kit (Ambion). The resulting aRNA was then screened for length and quality using a Bioanalyzer 2100 (Agilent) and quantified utilizing a Nanodrop 1000 spectrophotometer (Thermo Fisher Scientific). 5.5  $\mu\text{g}$  of biotinylated aRNA from each sample was then fractionated and hybridized ( $45^\circ\text{C}$ ) overnight to custom *Ca. Pelagibacter ubique* Affymetrix GeneChip arrays that contained probes for strains HTCC1002, HTCC1062 and HTCC7211 (Pubiquea520471f) using Affymetrix GeneChip Fluidics Station 450, and Affymetrix GeneChip Hybridization Oven 640. Arrays were then washed as per the manufacturer's instructions and the

resulting images were analyzed using an Affymetrix GeneChip Scanner 3000. Fluorescence measurements were normalized over all 18 microarray chips.

### Microarray Clustering

A modified radial coordinate visualization plot was used for illustrating mRNA expression in a manner that accentuated condition-specific preferential transcription. In Figure 2, dimensional anchors (DA) representing each of the six microarray samples were positioned manually around the circumference of a circle such that iron-limited samples are on the left, samples with excess iron are on the right, and the vertical placement corresponds to the culture's transition from exponential growth (bottom) to stationary phase (top). Each gene is represented by a single point, positioned according to the relative abundances between every sample pair, and sized according to the largest observed change in expression level.  $PT_g$  is the point for gene  $g$ , with attributes  $x$ ,  $y$ , and  $s$  describing its x-axis position, y-axis position, and size, respectively.  $S_{i,g}$  is the log base-10 average fluorescence for gene  $g$  in sample  $i$ .  $DA_i$  is sample  $i$ 's dimensional anchor positioned at  $(DA_{i,x}, DA_{i,y})$  on the graph.

$$PT_{g,s} = \max(S_{1..6,g}) - \min(S_{1..6,g})$$

$$PT_{g,x} = \sum_{1 \leq i < j \leq 6} [(DA_{i,x} - DA_{j,x}) \times (S_{i,g} - S_{j,g}) / PT_{g,s}]$$

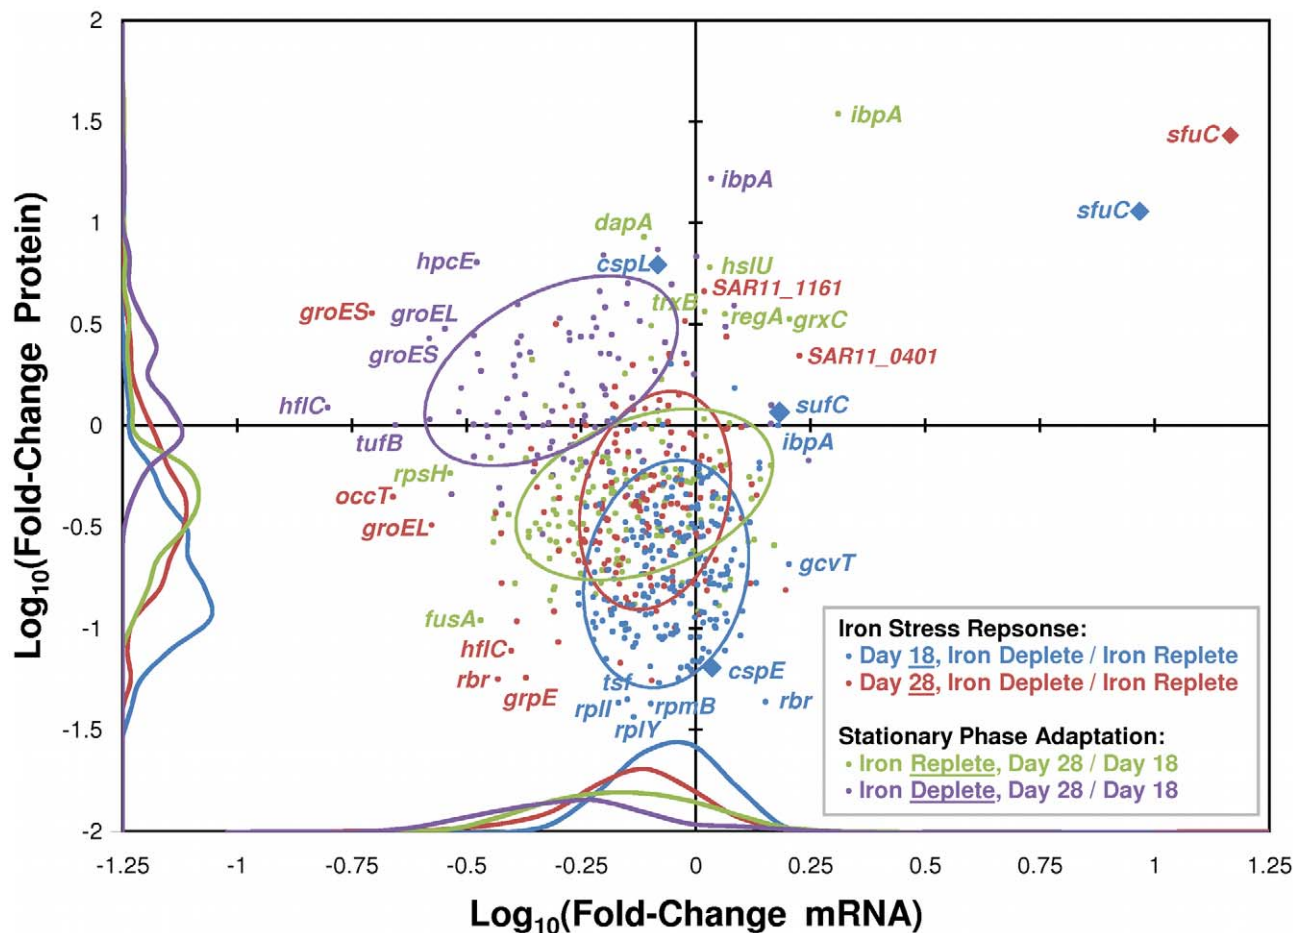

**Figure 3. Protein abundances were largely decoupled from transcript abundances.** The change in protein abundance versus the change in mRNA abundance was plotted for all *Ca. Pelagibacter ubique* genes that showed a significant ( $P < 0.05$ ) change in either measurement. Each color represents a different comparison between treatments or timepoints, with  $R^2$  values of 0.11, 0.08, 0.09, and 0.02 respective to the legend's ordering. Large ellipses indicate clusters of the same colored points. Histograms on the low end of each axis further define the distribution of points. Points represented by a diamond are discussed at length in the text.  
doi:10.1371/journal.pone.0010487.g003

$$PT_{g,y} = \sum_{1 \leq i < j \leq 6} [(DA_{i,y} - DA_{j,y}) \times (S_{i,g} - S_{j,g}) / PT_{g,s}]$$

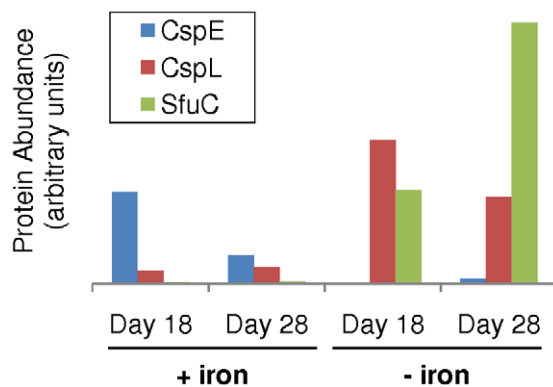

**Figure 4. Translation of *Ca. Pelagibacter ubique*'s cold shock and iron-binding genes are influenced by iron availability.** The abundance of two *Ca. Pelagibacter ubique* cold shock proteins, CspE and CspL, and the iron-binding protein SfuC, appear to be correlated with iron availability (p-value of .02, .08, and 3e-79, respectively).  
doi:10.1371/journal.pone.0010487.g004

This type of graph is ideal for revealing if a given gene's transcript abundance is changing as a result of iron limitation or as a result of the stationary phase transcriptome remodeling induced by iron limitation.

#### Global TFE Protein Preparation

Four samples were prepared using the TFE (2,2,2-Trifluoroethanol) digestion method. The cell pellets were reconstituted in 100 mM  $\text{NH}_4\text{HCO}_3$ , pH 8.4 buffer and transferred to a siliconized 0.6 mL microcentrifuge tube. 0.1 mm Zirconia/Silica Beads were added to the top of the tube and bead beat at maximum speed for 3 minutes and immediately placed on ice. A hole was poked in the base of the 0.6 mL siliconized eppendorf tube and placed in a 1.5 mL siliconized eppendorf tube. The sample was then centrifuged for 5 minutes at 14,000 rpm at 4°C. The cell lysis was mixed to a homogenized state and the volume was determined using a pipette. The sample concentration was determined with a Coomassie protein assay and read on a microplate reader. TFE was added to a concentration of 50%. The sample was then homogenized by sonication for one minute

in an ice bath followed by incubation at 60°C for two hours with gentle shaking (300 rpm). Proteins were reduced by adding DTT to a final concentration of 2 mM, sonicated for one minute in an ice bath and incubated at 37°C for one hour with gentle shaking. Samples were then diluted 5-fold with 100 mM NH<sub>4</sub>HCO<sub>3</sub> to reduce the salt concentration, and CaCl<sub>2</sub> was added to a final concentration of 1 mM. The sample was digested for 3 hours with Trypsin (Promega, Madison WI) at 37°C at a concentration of 1 unit trypsin/50 units protein. After trypsin incubation, a BCA protein assay was performed on the sample to determine the final concentration and vialled for mass spectrometer analysis.

### Capillary LC-MS Analysis

The custom HPLC system was configured using 65-mL Isco Model 65D syringe pumps (Isco, Inc., Lincoln, NE), 2-position Valco valves (Valco Instruments Co., Houston, TX), and a PAL autosampler (Leap Technologies, Carrboro, NC), allowing for fully automated sample analysis across four separate HPLC columns. Reversed-phase capillary HPLC columns were manufactured in-house by slurry packing 3- $\mu$ m Jupiter C18 stationary phase (Phenomenex, Torrance, CA) into a 70-cm length of 360  $\mu$ m o.d.  $\times$  75  $\mu$ m i.d. fused silica capillary tubing (Polymicro Technologies Inc., Phoenix, AZ) that incorporated a 0.5- $\mu$ m retaining screen in a 1/16" custom laser-bored 75  $\mu$ m i.d. union (screen and union – Valco Instruments Co., Houston, TX; laser bore - Lenox Laser, Glen Arm, MD). Mobile phases consisted of 0.2% acetic acid and 0.05% TFA in water (A) and 0.1% TFA in 90% acetonitrile/10% water (B). The mobile phase flowed through an in-line Degassex DG4400 degasser (Phenomenex, Torrance, CA). The HPLC system was equilibrated at 10 k psi with 100% mobile phase A. Fifty minutes after sample injection the mobile phase was switched to 100% B, which created a near-exponential gradient as mobile phase B displaced A in a 2.5 mL active mixer. A 30-cm length of 360  $\mu$ m o.d.  $\times$  15  $\mu$ m i.d. fused silica tubing was used to split  $\sim$ 20  $\mu$ L/min of flow before it reached the injection valve (5  $\mu$ L sample loop). The split flow controlled the gradient speed under conditions of constant pressure operation (10 k psi). Flow through the capillary HPLC column when equilibrated to 100% mobile phase A was  $\sim$ 400 nL/min.

MS analysis was performed using a ThermoFinnigan LTQ-Orbitrap mass spectrometer (Thermo Scientific, San Jose, CA) with electrospray ionization (ESI). The HPLC columns were coupled to the mass spectrometer by using an in-house manufactured interface. Chemically etched electrospray emitters, 150  $\mu$ m o.d.  $\times$  20  $\mu$ m i.d., were used [70]. The heated capillary temperature and spray voltage were 200°C and 2.2 kV, respectively. Data was acquired for 100 min, beginning 65 min after sample injection (15 min into gradient). Orbitrap spectra (AGC 1  $\times$  10<sup>6</sup>) were collected from 400–2000 m/z at a resolution of 100k followed by data dependant ion trap MS/MS spectra (AGC 1  $\times$  10<sup>4</sup>) of the six most abundant ions using a collision energy of 35%. A dynamic exclusion time of 60 sec was used to discriminate against previously analyzed ions. Three technical replicates were run on the mass spectrometer for each cell pellet.

### Quantitative Proteomics

Quantitative estimates of peptide abundances, calculated from the area under the isotopic profile, were obtained by using a previously developed accurate mass and time (AMT) tag library [34] to search the mass spectra generated by the 12 runs for the four samples. After deisotoping and calculating monoisotopic mass, mass spectrometric features were matched to database peptides with a mass tolerance window of  $\pm$ 6ppm and an elution time window of  $\pm$ 0.1% after alignment in both dimensions. Peptide abundances were reported for those which

had observations in at least 2 of the 3 technical replicates. Linear regression normalization was used to normalize each set of technical replicates as described elsewhere [71]. Briefly, the abundance of peptide  $x$  in sample  $i$  was transformed into minus versus average space using the following formulas:

$$m_i = \log_2(x_i/\bar{x})$$

$$a_i = \log_2(x_i \times \bar{x})/2$$

Next, the transformed value was corrected based on a linear regression:

$$m'_i = m_i - m_i^*$$

where  $m_i^*$  is the value for  $m_i$  calculated from the  $m$  vs  $a$  regression equation. Lastly, the computed values were deconvoluted to yield the normalized abundances:

$$x'_i = 2^{(m'_i + 2a_i)/2}$$

Peptides were excluded from further analysis if the standard deviation exceeded the average measurement value among the three technical replicates for a sample. A final filter was applied to exclude the lowest third of peptides for a given protein, when sorted by the peptides' maximum PeptideProphet F-Score.

Protein abundance was calculated only if a protein had three or more peptides which passed the above filters. Calculating the difference in protein abundance between two samples was a three step process. First, the three replicate peptide abundance measurements were averaged together. Next, the peptide average from sample 1 was divided by the peptide average from sample 2, then log<sub>10</sub> transformed. Finally, all log<sub>10</sub> peptide ratios from the same protein were averaged together.

To represent the likelihood that a protein was equally abundant in both samples, the multiple peptide measurements were combined into a single statistic as previously described [72]. Briefly, p-values for individual peptides were calculated using a one-tailed Student's t-test on the technical replicates'  $x'$  values. A two-tailed Student's t-test was not used because p-values reflecting a large increase would be indistinguishable from p-values reflecting a large decrease. Instead, peptides which changed in the opposite direction from the protein average were assigned a p-value of 1 for their one-tailed Student's t-test. All peptide p-values for a single protein were then combined into a single chi-square statistic using Fisher's method:

$$\chi^2 = -2 \times \sum \ln(P_i)$$

### Supporting Information

**Table S1** Coordinates of All Genes Plotted in Figure 2.

Found at: doi:10.1371/journal.pone.0010487.s001 (0.25 MB XLS)

### Acknowledgments

The authors would like to thank the crew of the Elaka for their help in seawater collection, Zanna Chase for measuring the iron concentration in that water, and Mark Wells for advice on siderophore selection and protocols. Input from Paul Carini greatly helped in the design of Figure 3.



## Author Contributions

Conceived and designed the experiments: DPS SJG. Performed the experiments: DPS JBK TRC MSL MSS LS CDN. Analyzed the data: DPS

ADN TRC MSL MSS. Contributed reagents/materials/analysis tools: RDS SJG. Wrote the paper: DPS ADN MSS SJG. Developed and made available analysis platforms: RDS.

## References

- Martin JH, Gordon RM, Fitzwater SE (1990) Iron in Antarctic waters. *Nature* 345: 156–158. doi:10.1038/345156a0.
- Coale KH, Johnson KS, Fitzwater SE, Gordon RM, Tanner S, et al. (1996) A massive phytoplankton bloom induced by an ecosystem-scale iron fertilization experiment in the equatorial Pacific Ocean. *Nature* 383: 495–501.
- Boyd PW, Watson AJ, Law CS, Abraham ER, Trull T, et al. (2000) A mesoscale phytoplankton bloom in the polar Southern Ocean stimulated by iron fertilization. *Nature* 407: 695–702.
- Fung IY, Meyn SK, Tegen I, Doney SC, John JG, et al. (2000) Iron supply and demand in the upper ocean. *Global Biogeochem Cycles* 14: 281–295.
- Andrews SC, Robins AK, Rodriguez-Quinones F (2003) Bacterial iron homeostasis. *FEMS Microbiol Rev* 27: 215–237. doi:10.1016/S0168-6445(03)00055-X.
- Johnson KS, Gordon RM, Coale KH (1997) What controls dissolved iron concentrations in the world ocean? *Mar Chem* 57: 137–161.
- Martin JH, Coale KH, Johnson KS, Fitzwater SE, Gordon RM, et al. (1994) Testing the iron hypothesis in ecosystems of the equatorial Pacific Ocean. *Nature* 371: 123–129. doi:10.1038/371123a0.
- Escolar L, Pérez-Martín J, de Lorenzo V (1999) Opening the iron box: transcriptional metalloregulation by the Fur protein. *J Bacteriol* 181: 6223–6229.
- Ducey TF, Carson MB, Orvis J, Stintzi AP, Dyer DW (2005) Identification of the iron-responsive genes of *Neisseria gonorrhoeae* by microarray analysis in defined medium. *J Bacteriol* 187: 4865–4874. doi:10.1128/JB.187.14.4865-4874.2005.
- Baichoo N, Helmann JD (2002) Recognition of DNA by Fur: a reinterpretation of the Fur box consensus sequence. *J Bacteriol* 184: 5826–5832. doi:10.1128/JB.184.21.5826-5832.2002.
- Fuangthong M, Helmann JD (2003) Recognition of DNA by three ferric uptake regulator (Fur) homologs in *Bacillus subtilis*. *J Bacteriol* 185: 6348–6357.
- Grifantini R, Sebastian S, Frigimelica E, Draghi M, Bartolini E, et al. (2003) Identification of iron-activated and -repressed Fur-dependent genes by transcriptome analysis of *Neisseria meningitidis* group B. *Proc Natl Acad Sci USA* 100: 9542–9547. doi:10.1073/pnas.1033001100.
- Lavrrar JL, McIntosh MA (2003) Architecture of a fur binding site: a comparative analysis. *J Bacteriol* 185: 2194–2202.
- Tiss A, Barre O, Michaud-Soret I, Forest E (2005) Characterization of the DNA-binding site in the ferric uptake regulator protein from *Escherichia coli* by UV crosslinking and mass spectrometry. *FEBS Lett* 579: 5454–5460. doi:10.1016/j.febslet.2005.08.067.
- Yang J, Sangwan I, Lindemann A, Hauser F, Hennecke H, et al. (2006) *Bradyrhizobium japonicum* senses iron through the status of haem to regulate iron homeostasis and metabolism. *Mol Microbiol* 60: 427–437. doi:10.1111/j.1365-2958.2006.05101.x.
- Rudolph G, Semini G, Hauser F, Lindemann A, Friberg M, et al. (2006) The iron control element, acting in positive and negative control of iron-regulated *Bradyrhizobium japonicum* genes, is a target for the Irr protein. *J Bacteriol* 188: 733–744. doi:10.1128/JB.188.2.733-744.2006.
- Martínez M, Ugalde RA, Almirón M (2005) Dimeric *Brucella abortus* Irr protein controls its own expression and binds haem. *Microbiology (Reading, Engl.)* 151: 3427–3433. doi:10.1099/mic.0.28213-0.
- Yang J, Ishimori K, O'Brian MR (2005) Two heme binding sites are involved in the regulated degradation of the bacterial iron response regulator (Irr) protein. *J Biol Chem* 280: 7671–7676. doi:10.1074/jbc.M411664200.
- Friedman YE, O'Brian MR (2003) A novel DNA-binding site for the ferric uptake regulator (Fur) protein from *Bradyrhizobium japonicum*. *J Biol Chem* 278: 38395–38401. doi:10.1074/jbc.M306710200.
- Hamza I, Chauhan S, Hassett R, O'Brian MR (1998) The bacterial irr protein is required for coordination of heme biosynthesis with iron availability. *J Biol Chem* 273: 21669–21674.
- Rodionov DA, Gelfand MS, Todd JD, Curson ARJ, Johnston AWB (2006) Computational reconstruction of iron- and manganese-responsive transcriptional networks in alpha-proteobacteria. *PLoS Comput Biol* 2: e163. doi:10.1371/journal.pcbi.0020163.
- Massé E, Arguin M (2005) Ironing out the problem: new mechanisms of iron homeostasis. *Trends Biochem Sci* 30: 462–468. doi:10.1016/j.tibs.2005.06.005.
- Massé E, Salvail H, Desnoyers G, Arguin M (2007) Small RNAs controlling iron metabolism. *Curr Opin Microbiol* 10: 140–145. doi:10.1016/j.mib.2007.03.013.
- Gaballa A, Antelmann H, Aguilar C, Khakh SK, Song K, et al. (2008) The *Bacillus subtilis* iron-sparing response is mediated by a Fur-regulated small RNA and three small, basic proteins. *Proc Natl Acad Sci USA* 105: 11927–11932. doi:10.1073/pnas.0711752105.
- Vecerek B, Moll I, Bläsi U (2007) Control of Fur synthesis by the non-coding RNA RyhB and iron-responsive decoding. *EMBO J* 26: 965–975. doi:10.1038/sj.emboj.7601553.
- Vergara SV, Thiele DJ (2008) Post-transcriptional regulation of gene expression in response to iron deficiency: co-ordinated metabolic reprogramming by yeast mRNA-binding proteins. *Biochem Soc Trans* 36: 1088–1090. doi:10.1042/BST0361088.
- Dubrac S, Touati D (2000) Fur positive regulation of iron superoxide dismutase in *Escherichia coli*: functional analysis of the sodB promoter. *J Bacteriol* 182: 3802–3808.
- Vraspir JM, Butler A (2009) Chemistry of Marine Ligands and Siderophores. *Annu Rev Mar Sci* 1: 43–63. doi:10.1146/annurev.marine.010908.163712.
- Venturi V, Ottevanger C, Bracke M, Weisbeck P (1995) Iron regulation of siderophore biosynthesis and transport in *Pseudomonas putida* WCS358: involvement of a transcriptional activator and of the Fur protein. *Mol Microbiol* 15: 1081–1093.
- Wilhelm SW, Maxwell DP, Trick CG (1996) Growth, iron requirements, and siderophore production in iron-limited *Synechococcus* PCC 7002. *Limnol Oceanogr* 41: 89–97.
- Liu X, Theil EC (2005) Ferritins: dynamic management of biological iron and oxygen chemistry. *Acc Chem Res* 38: 167–175. doi:10.1021/ar0302336.
- Hintze KJ, Theil EC (2006) Cellular regulation and molecular interactions of the ferritins. *Cell Mol Life Sci* 63: 591–600. doi:10.1007/s00018-005-5285-y.
- Giovannoni SJ, Tripp HJ, Givan S, Podar M, Vergin KL, et al. (2005) Genome streamlining in a cosmopolitan oceanic bacterium. *Science* 309: 1242–1245. doi:10.1126/science.1114057.
- Sowell SM, Norbeck AD, Lipton MS, Nicora CD, Callister SJ, et al. (2008) Proteomic analysis of stationary phase in the marine bacterium "*Candidatus* Pelagibacter ubique". *Appl Environ Microbiol* 74: 4091–4100. doi:10.1128/AEM.00599-08.
- Sowell SM, Wilhelm IJ, Norbeck AD, Lipton MS, Nicora CD, et al. (2009) Transport functions dominate the SAR11 metaproteome at low-nutrient extremes in the Sargasso Sea. *ISME J* 3: 93–105. doi:10.1038/ismej.2008.83.
- Schwalbach MS, Tripp HJ, Steindler L, Smith DP, Giovannoni SJ (2009) The presence of the glycolysis operon in SAR11 genomes is positively correlated with ocean productivity. *Environ Microbiol*. Available: <http://www.ncbi.nlm.nih.gov/pubmed/19889000>.
- Tripp HJ, Schwalbach MS, Meyer MM, Kimer JB, Breaker RR, et al. (2009) Unique glycine-activated riboswitch linked to glycine-serine auxotrophy in SAR11. *Environ Microbiol* 11: 230–238. doi:10.1111/j.1462-2920.2008.01758.x.
- Meyer MM, Ames TD, Smith DP, Weinberg Z, Schwalbach MS, et al. (2009) Identification of candidate structured RNAs in the marine organism '*Candidatus* Pelagibacter ubique'. *BMC Genomics* 10: 268. doi:10.1186/1471-2164-10-268.
- Corbino KA, Barrick JE, Lim J, Welz R, Tucker BJ, et al. (2005) Evidence for a second class of S-adenosylmethionine riboswitches and other regulatory RNA motifs in alpha-proteobacteria. *Genome Biol* 6: R70. doi:10.1186/gb-2005-6-8-r70.
- Worden AZ, Lee J, Mock T, Rouzè P, Simmons MP, et al. (2009) Green evolution and dynamic adaptations revealed by genomes of the marine picocaryotes *Micromonas*. *Science* 324: 268–272. doi:10.1126/science.1167222.
- Winkler W, Nahvi A, Breaker RR (2002) Thiamine derivatives bind messenger RNAs directly to regulate bacterial gene expression. *Nature* 419: 952–956. doi:10.1038/nature01145.
- Morris RM, Rappé MS, Connon SA, Vergin KL, Siebold WA, et al. (2002) SAR11 clade dominates ocean surface bacterioplankton communities. *Nature* 420: 806–810. doi:10.1038/nature01240.
- Malmstrom RR, Kiene RP, Cottrell MT, Kirchman DL (2004) Contribution of SAR11 bacteria to dissolved dimethylsulfoniopropionate and amino acid uptake in the North Atlantic ocean. *Appl Environ Microbiol* 70: 4129–4135. doi:10.1128/AEM.70.7.4129-4135.2004.
- Malmstrom RR, Cottrell MT, Elifantz H, Kirchman DL (2005) Biomass production and assimilation of dissolved organic matter by SAR11 bacteria in the Northwest Atlantic Ocean. *Appl Environ Microbiol* 71: 2979–2986. doi:10.1128/AEM.71.6.2979-2986.2005.
- Chen G, Gharib TG, Huang C, Taylor JMG, Misek DE, et al. (2002) Discordant protein and mRNA expression in lung adenocarcinomas. *Mol Cell Proteomics* 1: 304–313.
- Griffin TJ, Gygi SP, Ideker T, Rist B, Eng J, et al. (2002) Complementary profiling of gene expression at the transcriptome and proteome levels in *Saccharomyces cerevisiae*. *Mol Cell Proteomics* 1: 323–333.
- Ideker T, Thorsson V, Ranish JA, Christmas R, Buhler J, et al. (2001) Integrated genomic and proteomic analyses of a systematically perturbed metabolic network. *Science* 292: 929–934. doi:10.1126/science.292.5518.929.
- de Sousa Abreu R, Penalva LO, Marcotte EM, Vogel C (2009) Global signatures of protein and mRNA expression levels. *Mol Biosyst* 5: 1512–1526. doi:10.1039/b908315d.
- Nie L, Wu G, Cully DE, Scholten JCM, Zhang W (2007) Integrative analysis of transcriptomic and proteomic data: challenges, solutions and applications. *Crit Rev Biotechnol* 27: 63–75. doi:10.1080/07388550701334212.
- Wu G, Nie L, Zhang W (2008) Integrative analyses of posttranscriptional regulation in the yeast *Saccharomyces cerevisiae* using transcriptomic and proteomic data. *Curr Microbiol* 57: 18–22. doi:10.1007/s00284-008-9145-5.

51. Le Roch KG, Johnson JR, Florens L, Zhou Y, Santrosyan A, et al. (2004) Global analysis of transcript and protein levels across the *Plasmodium falciparum* life cycle. *Genome Res* 14: 2308–2318. doi:10.1101/gr.2523904.
52. Kudla G, Murray AW, Tollervey D, Plotkin JB (2009) Coding-sequence determinants of gene expression in *Escherichia coli*. *Science* 324: 255–258. doi:10.1126/science.1170160.
53. Ermolenko DN, Makhatadze GI (2002) Bacterial cold-shock proteins. *Cell Mol Life Sci* 59: 1902–1913.
54. Bae W, Xia B, Inouye M, Severinov K (2000) *Escherichia coli* CspA-family RNA chaperones are transcription antiterminators. *Proc Natl Acad Sci USA* 97: 7784–7789.
55. Stülke J (2002) Control of transcription termination in bacteria by RNA-binding proteins that modulate RNA structures. *Arch Microbiol* 177: 433–440. doi:10.1007/s00203-002-0407-5.
56. Graumann PL, Marahiel MA (1998) A superfamily of proteins that contain the cold-shock domain. *Trends Biochem Sci* 23: 286–290.
57. Henkin TM (2000) Transcription termination control in bacteria. *Curr Opin Microbiol* 3: 149–153.
58. Hofweber R, Horn G, Langmann T, Balbach J, Kremer W, et al. (2005) The influence of cold shock proteins on transcription and translation studied in cell-free model systems. *FEBS J* 272: 4691–4702. doi:10.1111/j.1742-4658.2005.04885.x.
59. Phadtare S, Severinov K, Inouye M (2003) Assay of transcription antitermination by proteins of the CspA family. *Meth Enzymol* 371: 460–471. doi:10.1016/S0076-6879(03)71034-9.
60. Hu KH, Liu E, Dean K, Gingras M, DeGraff W, et al. (1996) Overproduction of three genes leads to camphor resistance and chromosome condensation in *Escherichia coli*. *Genetics* 143: 1521–1532.
61. Xia B, Ke H, Inouye M (2001) Acquisition of cold sensitivity by quadruple deletion of the cspA family and its suppression by PNPase S1 domain in *Escherichia coli*. *Mol Microbiol* 40: 179–188.
62. Phadtare S, Inouye M (2001) Role of CspC and CspE in regulation of expression of RpoS and UspA, the stress response proteins in *Escherichia coli*. *J Bacteriol* 183: 1205–1214. doi:10.1128/JB.183.4.1205-1214.2001.
63. Phadtare S, Inouye M (1999) Sequence-selective interactions with RNA by CspB, CspC and CspE, members of the CspA family of *Escherichia coli*. *Mol Microbiol* 33: 1004–1014.
64. Geissmann T, Marzi S, Romby P (2009) The role of mRNA structure in translational control in bacteria. *RNA Biol* 6: 153–160.
65. Marzi S, Fechter P, Chevalier C, Romby P, Geissmann T (2008) RNA switches regulate initiation of translation in bacteria. *Biol Chem* 389: 585–598.
66. Jickells TD, An ZS, Andersen KK, Baker AR, Bergametti G, et al. (2005) Global iron connections between desert dust, ocean biogeochemistry, and climate. *Science* 308: 67–71. doi:10.1126/science.1105959.
67. Goldman JC (1984) Conceptual Role for Microaggregates in Pelagic Waters. *Bulletin of Marine Science* 35: 462–476.
68. Connon SA, Giovannoni SJ (2002) High-throughput methods for culturing microorganisms in very-low-nutrient media yield diverse new marine isolates. *Appl Environ Microbiol* 68: 3878–3885.
69. Rappé MS, Connon SA, Vergin KL, Giovannoni SJ (2002) Cultivation of the ubiquitous SAR11 marine bacterioplankton clade. *Nature* 418: 630–633. doi:10.1038/nature00917.
70. Kelly RT, Page JS, Luo Q, Moore RJ, Orton DJ, et al. (2006) Chemically etched open tubular and monolithic emitters for nano-electrospray ionization mass spectrometry. *Anal Chem* 78: 7796–7801. doi:10.1021/ac061133r.
71. Callister SJ, Barry RC, Adkins JN, Johnson ET, Qian W, et al. (2006) Normalization approaches for removing systematic biases associated with mass spectrometry and label-free proteomics. *J Proteome Res* 5: 277–286. doi:10.1021/pr050300l.
72. Hess A, Iyer H (2007) Fisher's combined p-value for detecting differentially expressed genes using Affymetrix expression arrays. *BMC Genomics* 8: 96. doi:10.1186/1471-2164-8-96.
